# Supplementary material for: Streamlining recombination-mediated genetic engineering by validating three neutral integration sites in Synechococcus sp. PCC 7002
Source: PubMed Central journal article supplement (PMC5458483; doi:10.1186/s13036-017-0061-8), 2017-06-05
Supplement: 13036_2017_61_MOESM4_ESM.pdf [file 13036_2017_61_MOESM4_ESM.pdf]

## Tables

**Table S1: Overview of primers used in this study.** The primers were used for generating linear dsDNA fragments with different lengths of homologous regions. The name indicates the neutral integration site, the length of the homologous region and the direction of the primer.

| Name          | Sequence (5' - 3')    |
|---------------|-----------------------|
| A0935-800-Fwd | AGTTTCCGGATCGATGAACC  |
| A0935-400-Fwd | CGCCCTTCCTTTGTGCTCAG  |
| A0935-200-Fwd | ACCAATCTTCAGCGGAAACAG |
| A0935-100-Fwd | ACGGGCTTCTAGCACAAATG  |
| A0935-800-Rev | AATTGAGACTTCAATTTATC  |
| A0935-400-Rev | CTGTTTACAGCAGCCCTTAG  |
| A0935-200-Rev | ACCACGCCAATGTCTACACC  |
| A0935-100-Rev | CGGTACAGATGTCTTGATCG  |
| A2842-800-Fwd | CGATAATCCAGCAACCCAAC  |
| A2842-400-Fwd | TTATGGAGGATGGCCACGAG  |
| A2842-200-Fwd | CCAGCAGCGGCTTGTGTTAG  |
| A2842-100-Fwd | CGATCGCCACACCGACTTTG  |
| A2842-800-Rev | TAGTAATAATTCAGCAGCAC  |
| A2842-400-Rev | AATCTGGCACTGTGGCAAGG  |
| A2842-200-Rev | CGTTGGTGAGGACAAAGAAG  |
| A2842-100-Rev | TCTAGATCTTGAATAATGAG  |
| A0159-800-Fwd | CCGATTAGACCCTAAATTC   |
| A0159-400-Fwd | TACCGCCAGGATCGGAAAGC  |
| A0159-200-Fwd | ATCGCCAGGGCCAAACAATG  |
| A0159-100-Fwd | ATGCAAAGTACAGTCCGCTC  |
| A0159-800-Rev | TTTCTGCAAGGCGTTGTTGG  |
| A0159-400-Rev | CACCAGGGCTAACACTTCAG  |
| A0159-200-Rev | TCTCGATCATAGGCGATCTC  |
| A0159-100-Rev | CGGCTGGTAATACAAGTGAG  |

**Table S2:** Comparison of the time required for the different transformation steps in the protocol provided by Frigaard *et al.* [21] versus the newly developed transformation protocol based on our research. The numbers indicate hours.

|                        | Incubation with DNA | Incubation (non-selective plates) | Incubation (selective plates) | Segregation | Total   |
|------------------------|---------------------|-----------------------------------|-------------------------------|-------------|---------|
| Frigaard <i>et al.</i> | 5                   | 72                                | 336-504                       | 192         | 605-773 |
| This work              | 6                   | 24                                | 96                            | 192         | 318     |
