# Supplementary material for: Streamlining recombination-mediated genetic engineering by validating three neutral integration sites in Synechococcus sp. PCC 7002
Source: PubMed Central journal article supplement (PMC5458483; doi:10.1186/s13036-017-0061-8), 2017-06-05
Supplement: 13036_2017_61_MOESM6_ESM.pdf [file 13036_2017_61_MOESM6_ESM.pdf]

(a)

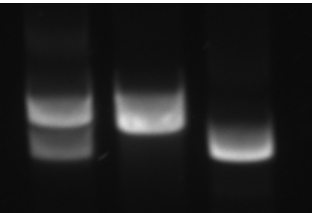

PS

FS

WT

(b)

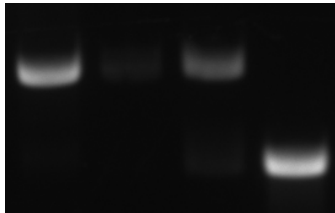

FS

FS

PS

WT

(c)

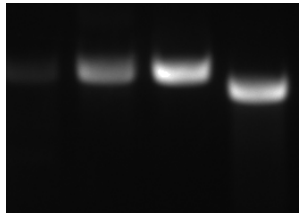

FS

FS

FS

WT
