# Supplementary material for: Streamlining recombination-mediated genetic engineering by validating three neutral integration sites in Synechococcus sp. PCC 7002
Source: PubMed Central journal article supplement (PMC5458483; doi:10.1186/s13036-017-0061-8), 2017-06-05

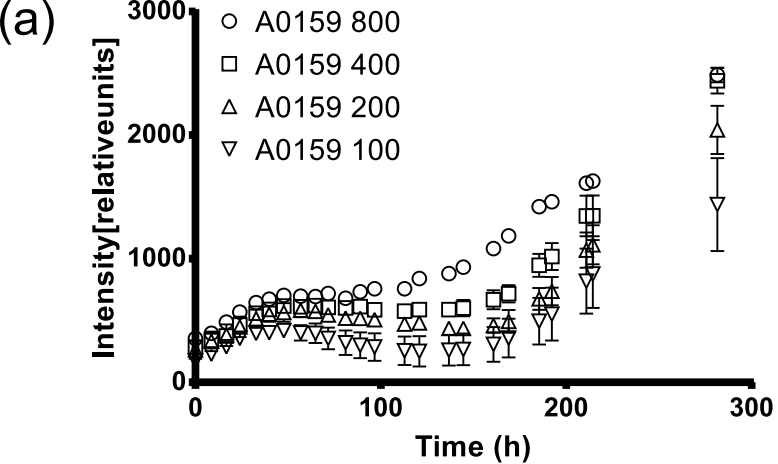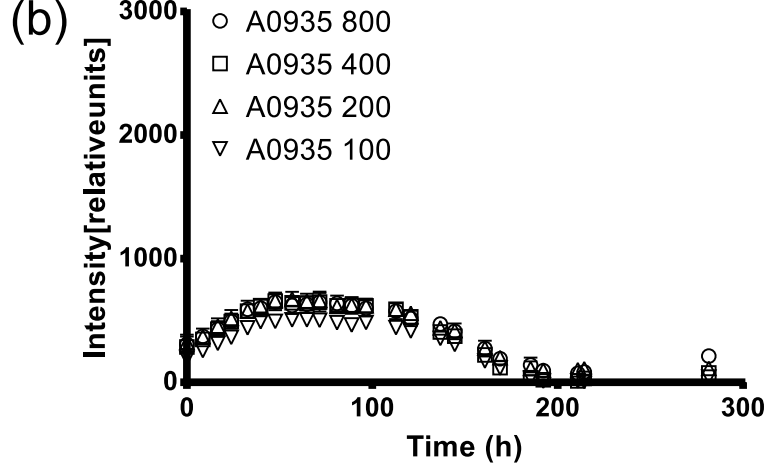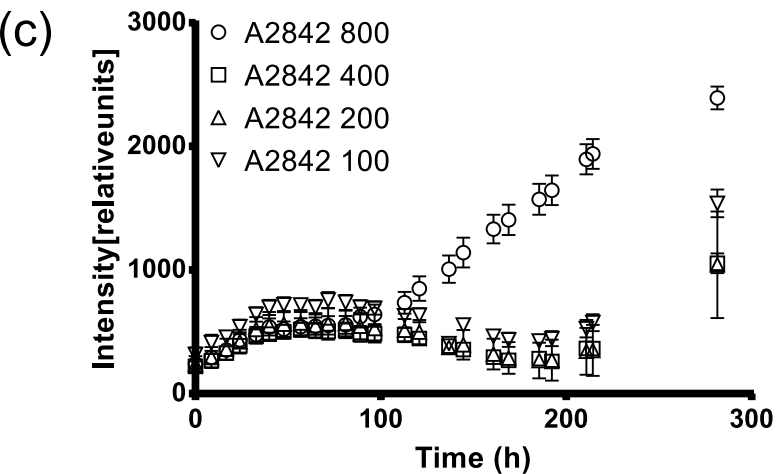

Supplement: 13036_2017_61_MOESM7_ESM.pdf [file 13036_2017_61_MOESM7_ESM.pdf]
